# Supplementary material for: Luminescence properties of Nd3+-doped LaF3 nanocrystals with a long lifetime in organic solvents
Source: Royal Society of Chemistry journal article supplement (doi:10.1039/c2jm15891d), 2012-01-01
Supplement: c2jm15891d.pdf [file c2jm15891d.pdf]

## Supplementary Information for:

# Luminescence Properties of Nd<sup>3+</sup>-doped LaF<sub>3</sub> Nanocrystals with a Long Lifetime in Organic Solvents

Wenxiu Sun,<sup>a</sup> Xiaoxia Cui,<sup>b</sup> Zhongyue Wang,<sup>a</sup> Wei Wei<sup>\*a,b</sup> and Bo Peng<sup>\*a,b</sup>

<sup>a</sup>Institute of Advanced Materials, Nanjing University of Posts and Telecommunications, Nanjing 210046, P.R. China.

<sup>b</sup>State Key Laboratory of Transient Optics and Photonics, Xi'an Institute of Optics and Precision Mechanics, Chinese Academy of Science (CAS) Xi'an Shaanxi 710119, P.R. China.

### Judd-Ofelt calculation

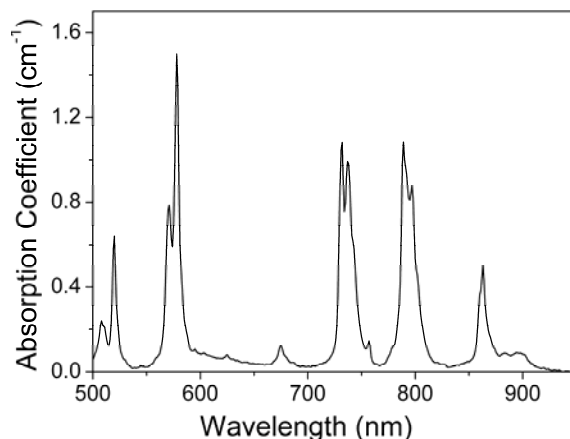

Fig. S1 Absorption spectrum of LaF<sub>3</sub>:Nd nanocrystals in DMSO/tetrabromoethane.

Fig. S1 shows the room temperature absorption spectrum of LaF<sub>3</sub>:Nd (3 mol%) nanocrystals in DMSO/tetrabromoethane, which was measured on a Unico UV-2000 scanning spectrophotometer. There are five transitions corresponding to transitions from <sup>4</sup>I<sub>9/2</sub> ground state manifold to various excited states. Based on the absorption spectrum, the experimental oscillator strengths ( $f_{exp}$ ) of each electronic transition of Nd<sup>3+</sup> can be evaluated by the following expression <sup>1</sup>:

$$f_{exp} = \frac{mc^2}{\pi e^2 N \lambda^2} \int \alpha(\lambda) d\lambda \quad (1)$$

Where  $m$  and  $e$  are electron mass and charge,  $c$  is the velocity of light,  $N$  is the

number density of  $\text{Nd}^{3+}$  ions, and  $\alpha(\lambda)$  is the absorption coefficient. According to Judd–Ofelt theory, the calculated oscillator strengths ( $f_{\text{cal}}$ ) of electronic transitions from the ground state ( $aJ$ ) level to the excited state ( $bJ'$ ) level are given by the equation<sup>2</sup>:

$$f_{\text{cal}}(aJ, bJ') = \frac{8\pi^2 mc}{3h\lambda(2J+1)} \frac{(n^2 + 2)^2}{9n} \sum_{t=2,4,6} \Omega_t \left| \langle aJ \| U^{(t)} \| bJ' \rangle \right|^2 \quad (2)$$

Where  $n$  is the refractive index of the host,  $h$  is the Planck constant,  $2J + 1$  is the degeneracy of the ground state.  $|\langle aJ \| U^{(t)} \| bJ' \rangle|^2$  represents the reduced matrix elements that are insensitive to the local environment, and those values for  $\text{Nd}^{3+}$  ions in  $\text{LaF}_3$  given by *Carnall et al* were used in the calculations<sup>3, 4</sup>. The values of the three Judd-Ofelt parameters  $\Omega_t$  (2, 4, 6) were provided by a least-squares fitting of  $f_{\text{exp}}$  to  $f_{\text{cal}}$ . According to the Judd-Ofelt formulae described, measured oscillator strengths ( $f_{\text{exp}}$ ), calculated oscillator strengths ( $f_{\text{cal}}$ ) and Judd-Ofelt parameters  $\Omega_t$  of  $\text{LaF}_3:\text{Nd}$  nanocrystals were determined. (Listed in Table S1)

Table S1 Observed absorption peak positions, integrated absorption coefficient, measured oscillator strengths ( $f_{\text{exp}}$ ), calculated oscillator strengths ( $f_{\text{cal}}$ ) and Judd-Ofelt parameters of the  $\text{LaF}_3:\text{Nd}$  nanocrystals<sup>a</sup>.

| Electronic transition<br>(from $^4\text{I}_{9/2}$ )       | Absorption peak<br>(nm) | Absorption coefficient<br>$\int \alpha(\lambda) d\lambda (10^{-7})$ | Oscillator strength<br>$f_{\text{exp}} (10^{-6} \text{ cm}^2)$ | Oscillator strength<br>$f_{\text{cal}} (10^{-6} \text{ cm}^2)$ |
|-----------------------------------------------------------|-------------------------|---------------------------------------------------------------------|----------------------------------------------------------------|----------------------------------------------------------------|
| $^4\text{G}_{7/2} + ^4\text{G}_{9/2} + ^2\text{K}_{13/2}$ | 520                     | 5.0182                                                              | 1.65721                                                        | 2.24068                                                        |
| $^4\text{G}_{5/2} + ^2\text{G}_{7/2}$                     | 578                     | 14.1402                                                             | 3.77952                                                        | 5.37280                                                        |
| $^4\text{F}_{7/2} + ^4\text{S}_{3/2}$                     | 732                     | 15.62548                                                            | 2.60404                                                        | 3.60157                                                        |
| $^4\text{F}_{5/2} + ^4\text{H}_{9/2}$                     | 789                     | 15.68613                                                            | 2.25009                                                        | 3.33696                                                        |
| $^4\text{F}_{3/2}$                                        | 863                     | 6.08722                                                             | 0.72985                                                        | 0.97020                                                        |
| $\Omega_2 (\times 10^{-20} \text{ cm}^2)$                 |                         | 0.81                                                                |                                                                |                                                                |
| $\Omega_4 (\times 10^{-20} \text{ cm}^2)$                 |                         | 1.78                                                                |                                                                |                                                                |
| $\Omega_6 (\times 10^{-20} \text{ cm}^2)$                 |                         | 2.47                                                                |                                                                |                                                                |

<sup>a</sup>Based on absorption data from  $\text{LaF}_3:\text{Nd}$  (3 mol%).

From the Judd–Ofelt parameters  $\Omega_t$  obtained above, the radiative transition rates for

electronic dipole transitions between an excited state and the lower lying levels can be calculated by the following equation <sup>5</sup>:

$$A(aJ, bJ') = \frac{64\pi^4 e^2 n^2 \chi}{3h\lambda^3 (2J+1)} \sum_{t=2,4,6} \Omega_t \left| \langle 4f^N aJ \| U^{(t)} \| 4f^N bJ' \rangle \right|^2 \quad (3)$$

The radiative lifetime of the  ${}^4F_{3/2}$  state is related to the radiative decay rate through following formula <sup>6</sup>:

$$\tau_r(a) = \frac{1}{A_{ed}(a)} = \frac{1}{\sum_b A_{ed}(ab)} \quad (4)$$

The quantum efficiency ( $\varphi$ ) of the emission bands can be evaluated from the following function <sup>7</sup>:

$$\varphi = \frac{\tau_{mea}}{\tau_{rad}} \quad (5)$$

The emission spectra of LaF<sub>3</sub>:Nd nanocrystals shows three emission bands centered at 880, 1060, and 1330 nm. The fluorescence branching ratios of these bands, radiative transition probability ( $A_{rad}$ ) between the excited states, and radiative lifetime of an emitting state were presented in Table S2.

Table S2 Observed emission bands, their measured and calculated radiative properties of LaF<sub>3</sub>:Nd<sup>a</sup>

| Transition from ${}^4F_{3/2}$ | Wavelength (nm) | $A_{rad}(s^{-1})$ | $\beta_{exp}(\%)$ | $\tau_{cal}(\mu s)$ |
|-------------------------------|-----------------|-------------------|-------------------|---------------------|
| ${}^4I_{13/2}$                | 1323            | 511.037           | 38.49             | 753                 |
| ${}^4I_{11/2}$                | 1057            | 674.332           | 50.78             |                     |
| ${}^4F_{9/2}$                 | 863             | 142.498           | 10.73             |                     |

<sup>a</sup>Based on emission data from LaF<sub>3</sub>:Nd (3 mol%, sample F4).

To compute the quantum efficiency, measured lifetime data was confirmed by the radiative lifetime: In this work, a lifetime of 359  $\mu s$  was measured for the  ${}^4F_{3/2} \rightarrow {}^4I_{11/2}$  transition of LaF<sub>3</sub>:Nd nanocrystals dispersed in DMSO/tetrabromoethane. According to the function (5), the emission quantum yield is deduced to be as high as 47.7 %.

## References

- 1 H. Lin, E. Y. B. Pun, S. Q. Man and X. R. Liu, *J. Opt. Soc. Am. B*, 2001, **18**, 602.
- 2 S. T. Tanabe, T. Ohyagi, N. Soga and T. Hanada, *Phys. Rev. B*, 1992, **46**, 3305.
- 3 W. T. Carnall, P. R. Fields and B. G. Wybourne, *J. Chem. Phys.*, 1965, **42**, 3797.
- 4 W. T. Carnall, P. R. Fields and K. Rajnak, *J. Chem. Phys.*, 1968, **49**, 4412.
- 5 X. X. Cui, J. B. Lu, C. Gao, C. Q. Hou, W. Wei and B. Peng, *Appl. Phys. A*, 2011, **103**, 27.
- 6 G. A. Kumar, A. Martinez and E. D. L. Rosa, *J. Lumin.*, 2002, **99**, 141.
- 7 G. A. Kumar, C. W. Chen and R. E. Riman, *J. Nanosci. Nanotechnol.*, 2008, **8**, 6558.
